# Supplementary material for: Damage-induced reactive oxygen species regulate vimentin and dynamic collagen-based projections to mediate wound repair
Source: eLife. 2018 Jan 16;7:e30703. doi: 10.7554/eLife.30703 (PMC5790375; doi:10.7554/eLife.30703)
Supplement: Figure 2—source data 2. [file elife-30703-fig2-data2.xlsx]

## Sheet: Sheet1
Figure2 - Source Data 2
Figure 2J. Fluorescence intensity (arbitrary units) of vim:egfp expression at the wound edge relative to fin background in DMSO (control) and DPI treated larvae at 24 hpw
	intensity at wound edge/background
	DMSO	DPI
Replicate 1	1.6046	1.21361
	1.15357	1.13757
	1.32671	0.992208
Replicate 2	1.4257	1.11728
	1.40792	1.28794
		1.21925
Replicate 3	1.09459	1.01941
	1.05301	1.02704
	1.02695	1.01137
	1.08835	1.0602
	1.04912	1.04672
	1.06406	1.17996
