# Supplementary material for: Damage-induced reactive oxygen species regulate vimentin and dynamic collagen-based projections to mediate wound repair
Source: eLife. 2018 Jan 16;7:e30703. doi: 10.7554/eLife.30703 (PMC5790375; doi:10.7554/eLife.30703)
Supplement: Figure 3—source data 1. [file elife-30703-fig3-data1.xlsx]

## Sheet: regenerate area vimMO
Figure 3 - Source Data 1
Figure 3B. Regenerate area (in square microns) in control MO and vim M1 knockdown at 3 dpw
	WT	MO1
Replicate 1	94929.3	80256.3
	96293.3	71021.2
	98696.2	63073.7
	107048	71850.4
	103330	83028.5
	102796	94482.5
	93084	79077.1
	104325	113956
	85886.8	81534.4
	108238	72441.2
	123380	77268.6
	106756	30855.5
	109033	55364.7
	97249.9	84347.3
	102039	95713.1
	107105	82306.3
	107046	82825.8
	106740	34885.5
	96183.5	72622
	104965
	90765.3
	89717.8
Replicate 2	89367.5	51317.1
	115001	81651.2
	100076	47206.2
	105244	88919.7
	98843.2	80294.2
	99959.7	67880.5
	95925.4	57056.1
	83329.7	19292.4
	109144	48089.3
	99083.3	29365.1
	106662	67217.1
	105331	52177.9
	97894.5	76026
	108431	27487.6
	113388	54673.7
	92781.5	83829.5
	103921	21659.5
	114201	38493.5
	116437	73335.8
	99793.2	34155
	92425.9	73555.1
		68618.9
		78972.6
		44900.5
		17457.3
		65257
		42509.9
		74531.7
		58231
		59285.2
Replicate 3	77786.1	20327.6
	89425.9	67925
	80186	63408.7
	78237.9	26415.2
	92350.2	40578
	80983.1	24100.5
	82605.9	42228.9
	95239.4	66886
	94118.2	83570.8
	84066.7	56554.5
	78923.9	29196.6
	85006.5	34146.1
	82138.5	63117.5
	80366.8	56915.4
	80218.2	43878.5
	90222.6	67328.9
	94419.8	28138.8
	88914
	67997.3
	85838.4
Replicate 4	103787	40475.3
	88251.3	94463
	97929.7	97406.4
	93935.2	91083.5
	113032	70344
	113993	72443
	125016	91143.3
	118096	71529
	99981.9	93334.6
	99998.1	31931.2
	108840	75180.9
	92795.7	69820.7
	107803	86465.6
	102144	69754.4
	111267	85441.1
	100369	88363.7
	98559.6	100587
	114282	97092.4
	85113.5	82647.3
	118752
	91225.2
	102639
