# Supplementary material for: Damage-induced reactive oxygen species regulate vimentin and dynamic collagen-based projections to mediate wound repair
Source: eLife. 2018 Jan 16;7:e30703. doi: 10.7554/eLife.30703 (PMC5790375; doi:10.7554/eLife.30703)
Supplement: Figure 3—source data 2. [file elife-30703-fig3-data2.xlsx]

## Sheet: Sheet1
Figure 3 - Source Data 3
Figure 3I. Regenerate area (in square microns) in control and Vim transient Crispr at 3 dpw
	Control	Vim
Replicate 1	120206	100804
	110229	81247.2
	107613	82237.7
	99891.6	48438.7
	113838	57670.4
	120368	93961.1
	102794	97279.4
	106560	106414
	88329.4	85505.9
	108500	51171.3
	129834	99258.7
	100359	95685.3
	107763	76615
	109922	116157
	100527	76381.8
	113223	55288.4
	85736.1	72759.2
	112951	58334.8
	114567	97897.1
	125430	51408.8
	111626	97038.6
	115535	66065.8
	126179	114984
	117696	106058
	119269	57939.4
	97050.2	98321
	110133	88473.7
	108210	92666.4
	110439	82476.5
	99055.7	101295
	117775	98812.9
	111206	90649.3
	98393.6	70979
	119011	61502.5
	101491	73898.3
	106258	103048
	125266
	106977
	114471
	86971.1
	100259
	103216
	107364
	124323
	108045
Replicate 2	91788.9	100626
	81007.9	72028.1
	90637.5	101000
	86032.2	66533.2
	69170.9	80098.8
	98832.2	97551.8
	88506.7	55177.4
	89815.6	82920.2
	110029	92530.6
	89946.3	112594
	93979.1	110158
	120029	22886.7
	106492	67609.9
	93901.8	75691.4
	112245	78302.6
	127855	101785
	92607.2	101358
	117131	76235.8
	95450.2	57112.6
	98682.9	79886.1
	109668	73078.3
	101916	74741.5
	71946.5	28931.6
	99564.9	49086.1
	84125.6	89656
	100694	77095.5
	96448.3	72924.4
	83295.4	104225
	117763	49791.3
	112313	77345.6
	110370	64657.1
	113011	84217.5
	111572	64206.6
	101503	91542.1
	117773	120505
	89710.8	48958.4
	68538.7	102285
	81454.1	82597.1
	98881.6	90012.6
	99173.2	82197.8
	99261.8
	97130.3
Replicate 3	126276	117272
	114441	124308
	139972	117708
	121549	116369
	131831	116335
	127971	115191
	145854	116666
	133716	98657.7
	129358	120566
	128909	119055
	133957	108659
	131864	117407
	128326	135570
	113540	119973
	118621	122887
	130393	130967
	145233	111168
	145324	118338
	125046	119932
	118830	111892
	136953	125018
	156066	109881
	125266	123385
	133187	115292
	129276	136518
	144675	138555
	117565	113610
	131771	96337.1
	137139	97151.6
	139957	112694
	117051	115253
	144509	102002
	129179	111668
	138244	117277
	134743	110057
	135694	103614
	135063	116893
	131182	104297
	126906	126293
	140603	116865
	124537	105056
	137324	106731
	130668	111744
