# Supplementary material for: Damage-induced reactive oxygen species regulate vimentin and dynamic collagen-based projections to mediate wound repair
Source: eLife. 2018 Jan 16;7:e30703. doi: 10.7554/eLife.30703 (PMC5790375; doi:10.7554/eLife.30703)
Supplement: Figure 4—source data 2. [file elife-30703-fig4-data2.xlsx]

## Sheet: Sheet1
Figure 4 - Source Data 2
Figure 4D. Proportion of larvae exibiting visible projections at wound edge with DMSO (control) or DPI treatment at 24 hpw
	DMSO				DPI
	projections	no projections	percent with projections		projections	no projections	percent with projections
Replicate 1	9	3	0.75		3	8	0.27
Replicate 2	5	5	0.5		2	9	0.18
Replicate 3	18	7	0.72		8	18	0.31
