# Supplementary material for: Damage-induced reactive oxygen species regulate vimentin and dynamic collagen-based projections to mediate wound repair
Source: eLife. 2018 Jan 16;7:e30703. doi: 10.7554/eLife.30703 (PMC5790375; doi:10.7554/eLife.30703)
Supplement: Figure 5—source data 1. [file elife-30703-fig5-data1.xlsx]

## Sheet: Contour vimMO
Figure 5 - Source Data 1
Figure 5G: Contour length (in microns) of wound edge in Ctl MO and VimMO larvae 1dpw
	ctrl MO	VimMO
Replicate 1	316.149	309.434
	298.872	326.597
	395.46	263.168
	360.748	362.945
	454.545	309.725
	366.611	294.916
	339.411	307.277
	336.922	254.064
		296.108
Replicate 2	237.172	272.443
	289.587	256.149
	332.302	230.519
	229.63	230.085
	246.289	234.706
	238.077	239.954
	230.415	223.581
	297.144	263.481
	247.258
Replicate 3	275.606	287.797
	252.998	260.459
	297.709	255.602
	237.482	226.565
	311.278	238.694
	303.169	231.804
	265.831	282.379
	348.663	253.013
	324.56	237.477
Replicate 4	232.155	275.535
	333.767	180.862
	244.569	270.253
	245.286	280.003
	243.293	256.926
	254.522	280.107
	270.647
