# Supplementary material for: Damage-induced reactive oxygen species regulate vimentin and dynamic collagen-based projections to mediate wound repair
Source: eLife. 2018 Jan 16;7:e30703. doi: 10.7554/eLife.30703 (PMC5790375; doi:10.7554/eLife.30703)
Supplement: Figure 5—source data 2. [file elife-30703-fig5-data2.xlsx]

## Sheet: Sheet1
Figure 5 - Source Data 2
Figure 5H. Fiber angle relative to wound edge in control and vimMO larvae
	CtrlMO	vimMO
Replicate 1	64.4	69.99
	71.91	59.75
	72.64	66.36
	67.12	66.01
	74.06	49.66
	70.54	49.31
	76.77	54.4
		59.53
		64.57
Replicate 2	72.41	69.72
	73	52.91
	70.6	59.06
	66.08	70.66
	67.28	65.84
	75.2	72.48
	70.95	67.53
	76.72	73.81
Replicate 3	75.32	54.67
	68.78	64.02
	66.98	66.74
	66.41	63.42
	72.42	71.83
	67.76	70.3
	70.58	36.23
	75.8	62.15
		66.75
Replicate 4	78.75	53.53
	58.02	62.48
	50.34	63.74
	68.83	66.16
	53.58	55.24
	63.13	55.49
	60.59
