# Supplementary material for: Damage-induced reactive oxygen species regulate vimentin and dynamic collagen-based projections to mediate wound repair
Source: eLife. 2018 Jan 16;7:e30703. doi: 10.7554/eLife.30703 (PMC5790375; doi:10.7554/eLife.30703)
Supplement: Figure 6—source data 1. [file elife-30703-fig6-data1.xlsx]

## Sheet: Sheet1
Figure 6 - Source Data 1
Figure 6D. col1a1 and col2a1b expression following wounding
	col1a1 expression					col2a1b expression
	no wound	8 hpw	no wound	24 hpw		no wound	8 hpw	no wound	24 hpw
	1	0.709562	1	1.6644		1	1.10957	1	1.50525
	1	1.14472	1	2.35381		1	1.06437	1	1.10957
	1	0.724471	1	1.33793		1	0.843816	1	1.52626
	1	0.639493	1	1.10957				1	2.23457
	1	0.471392	1	1.54757				1	1.6358
			1	1.75321
