# Supplementary material for: Damage-induced reactive oxygen species regulate vimentin and dynamic collagen-based projections to mediate wound repair
Source: eLife. 2018 Jan 16;7:e30703. doi: 10.7554/eLife.30703 (PMC5790375; doi:10.7554/eLife.30703)
Supplement: Figure 6—source data 2. [file elife-30703-fig6-data2.xlsx]

## Sheet: Col express in vimMO
Figure 6 - Source Data 2
Figure 6E. col1a1 and col2a1b expression following wounding with vim MO treatment
	col1a1 expression			col2a1b expression
	ctl MO	vim MO		ctl MO	vim MO
	1	0.430773		1	0.503478
	1	0.295248		1	0.852636
	1	0.481298		1	0.48971
	1	0.306721		1	0.9075
	1	0.6029		1	0.1233
	1	0.0813
