# Supplementary material for: Damage-induced reactive oxygen species regulate vimentin and dynamic collagen-based projections to mediate wound repair
Source: eLife. 2018 Jan 16;7:e30703. doi: 10.7554/eLife.30703 (PMC5790375; doi:10.7554/eLife.30703)
Supplement: Figure 7—source data 1. [file elife-30703-fig7-data1.xlsx]

## Sheet: Sheet1
Figure 7 - Source Data 4
Figure 7D. Proportion of larvae exibiting visible projections with amutation or burn wound at 24 h post injury
	Amputation				Burn
	projections	no projections	percent with projections		projections	no projections	percent with projections
Replicate 1	20	4	0.83		5	19	0.21
Replicate 2	18	6	0.75		2	19	0.1
Replicate 3	15	9	0.63		3	14	0.18
