# Supplementary material for: Damage-induced reactive oxygen species regulate vimentin and dynamic collagen-based projections to mediate wound repair
Source: eLife. 2018 Jan 16;7:e30703. doi: 10.7554/eLife.30703 (PMC5790375; doi:10.7554/eLife.30703)
Supplement: Figure 7—source data 2. [file elife-30703-fig7-data2.xlsx]

## Sheet: Sheet1
Figure 7 - Source Data 2
Figure 7E: Change in caudal fin regenerate area (in square microns) between 24 hpw and 48 hpw with amputation or burn
	Amputation	Burn
Replicate 1	1174.01	376.496
	1460.41	705.663
	1326.28	546.473
	1593.72	1560.95
	1252.01	756.595
	996.87	563.483
	859.854	766.157
	1355.01	472.284
	1343.21	928.734
	998.382	651.534
	1258.26	893.682
	1143.49	1202.95
	1150.36	251.686
	742.036	353.288
	1383.84	-199.816
	1312.65	149.099
	704.389	306.968
	897.526	536.574
	1173.6	897.766
	976.544	638.897
	1509.13	-190.902
	1284.45
Replicate 2	739.081	739.225
	864.252	222.592
	304.854	463.322
	1161.71	104.725
	1071.73	-26.812
	853.993	102.202
	942.861	652.999
	779.323	59.077
	949.228	438.336
	999.368	722.168
	1452.05	747.514
	1186.98	745.111
	1126.2	960.087
	974.286	498.038
	851.662	522.376
	869.393	549.836
	1344.3	31.713
	1260.47	27.557
	1035.07	646.608
	1064.98	269.08
	924.722	598.896
	1362.55
Replicate 3	2938.9	881.845
	4092.48	189.531
	3798.86	-3656.76
	3804.19	-1210.15
	4286.5	795.566
	3259.22	1897.81
	3977.74	473.662
	2850.87	1890.82
	2333.95	1953.47
	3736.63	2006.14
	2602.44	1123.79
	3832.39	1202.33
	4301.56	1808.12
	4323.86	3468.56
	4470.13	1586.89
	4122.01	554.2
	4141.07
	3199.23
	3792.71
	4768.57
	3560.41
