# Supplementary material for: Damage-induced reactive oxygen species regulate vimentin and dynamic collagen-based projections to mediate wound repair
Source: eLife journal article supplement (doi:10.7554/elife.30703), 2018-01-16
Supplement: supp [file elife_poa_e30703_Figure_6_source_data_3.xlsx]

## Sheet: Col express in DPI
Figure 6 - Source Data 3
Figure 6F. col1a1 and col2a1b expression following wounding with vim MO treatment as fold change over control (DMSO) wound
	col1a1 expression			col2a1b expression
	DMSO	DPI		DMSO	DPI
	1	0.298334		1	0.357249
	1	0.12807		1	0.358489
	1	0.4308		1	0.6263
	1	0.917		1	0.7071
