# Supplementary figures and images for: Damage-induced reactive oxygen species regulate vimentin and dynamic collagen-based projections to mediate wound repair
Source: eLife journal article supplement (doi:10.7554/elife.30703), 2018-01-16

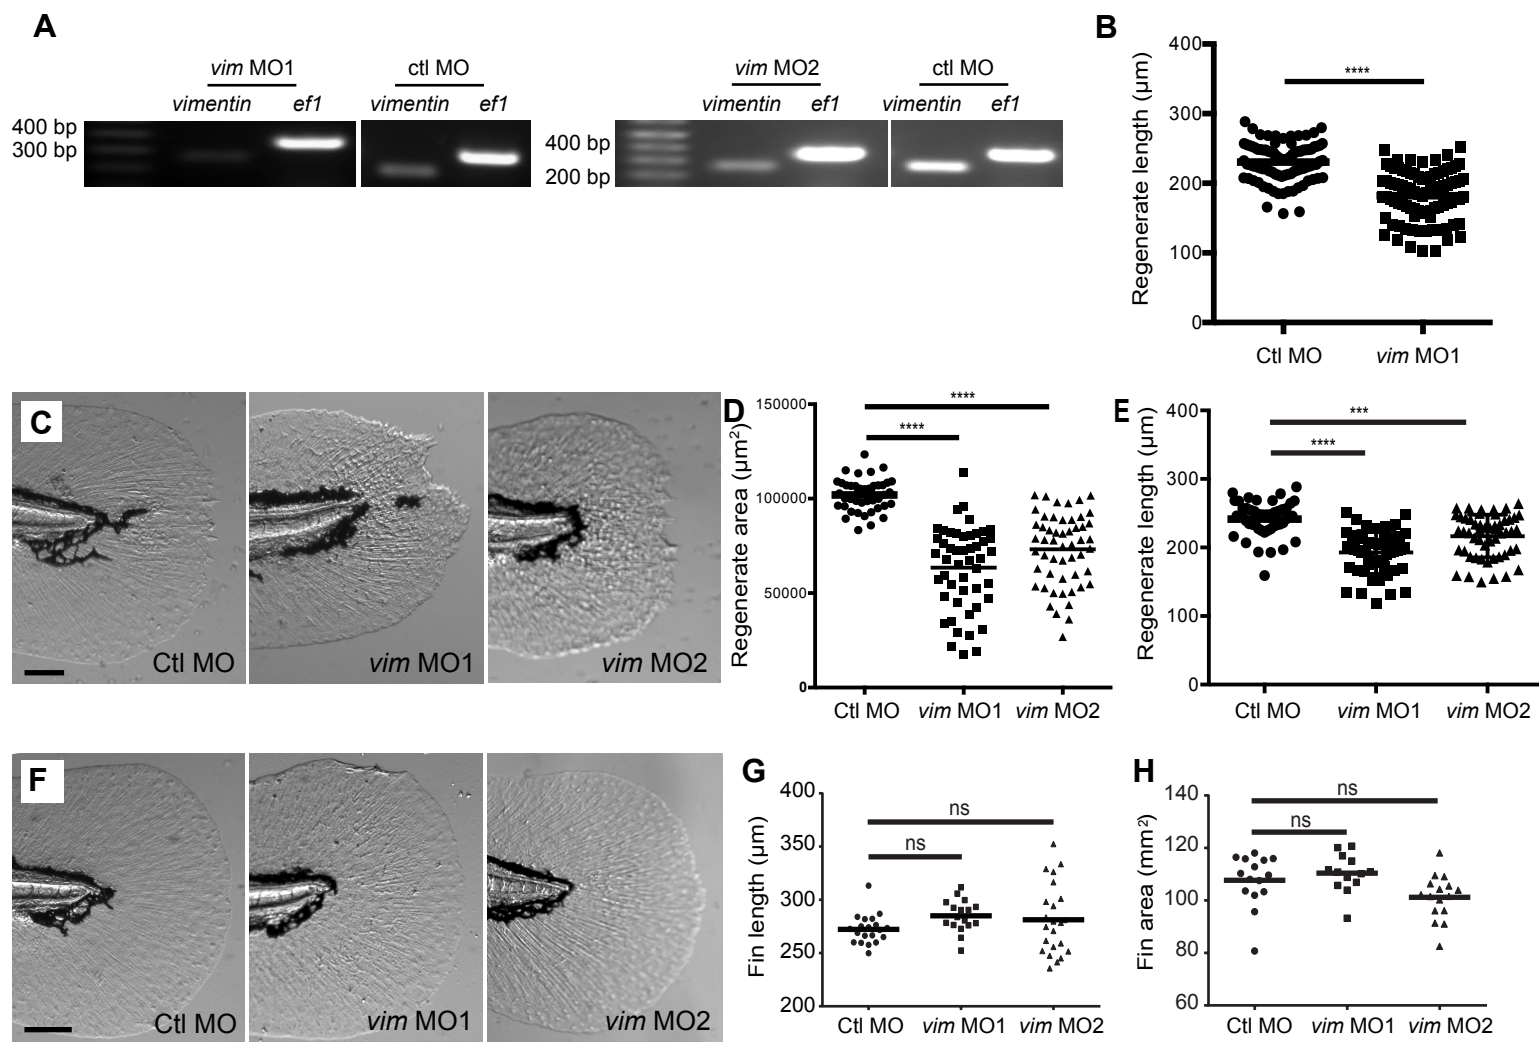

Figure 3-figure supplement 1

Supplement: supp [file elife-30703-supp-v1.zip]

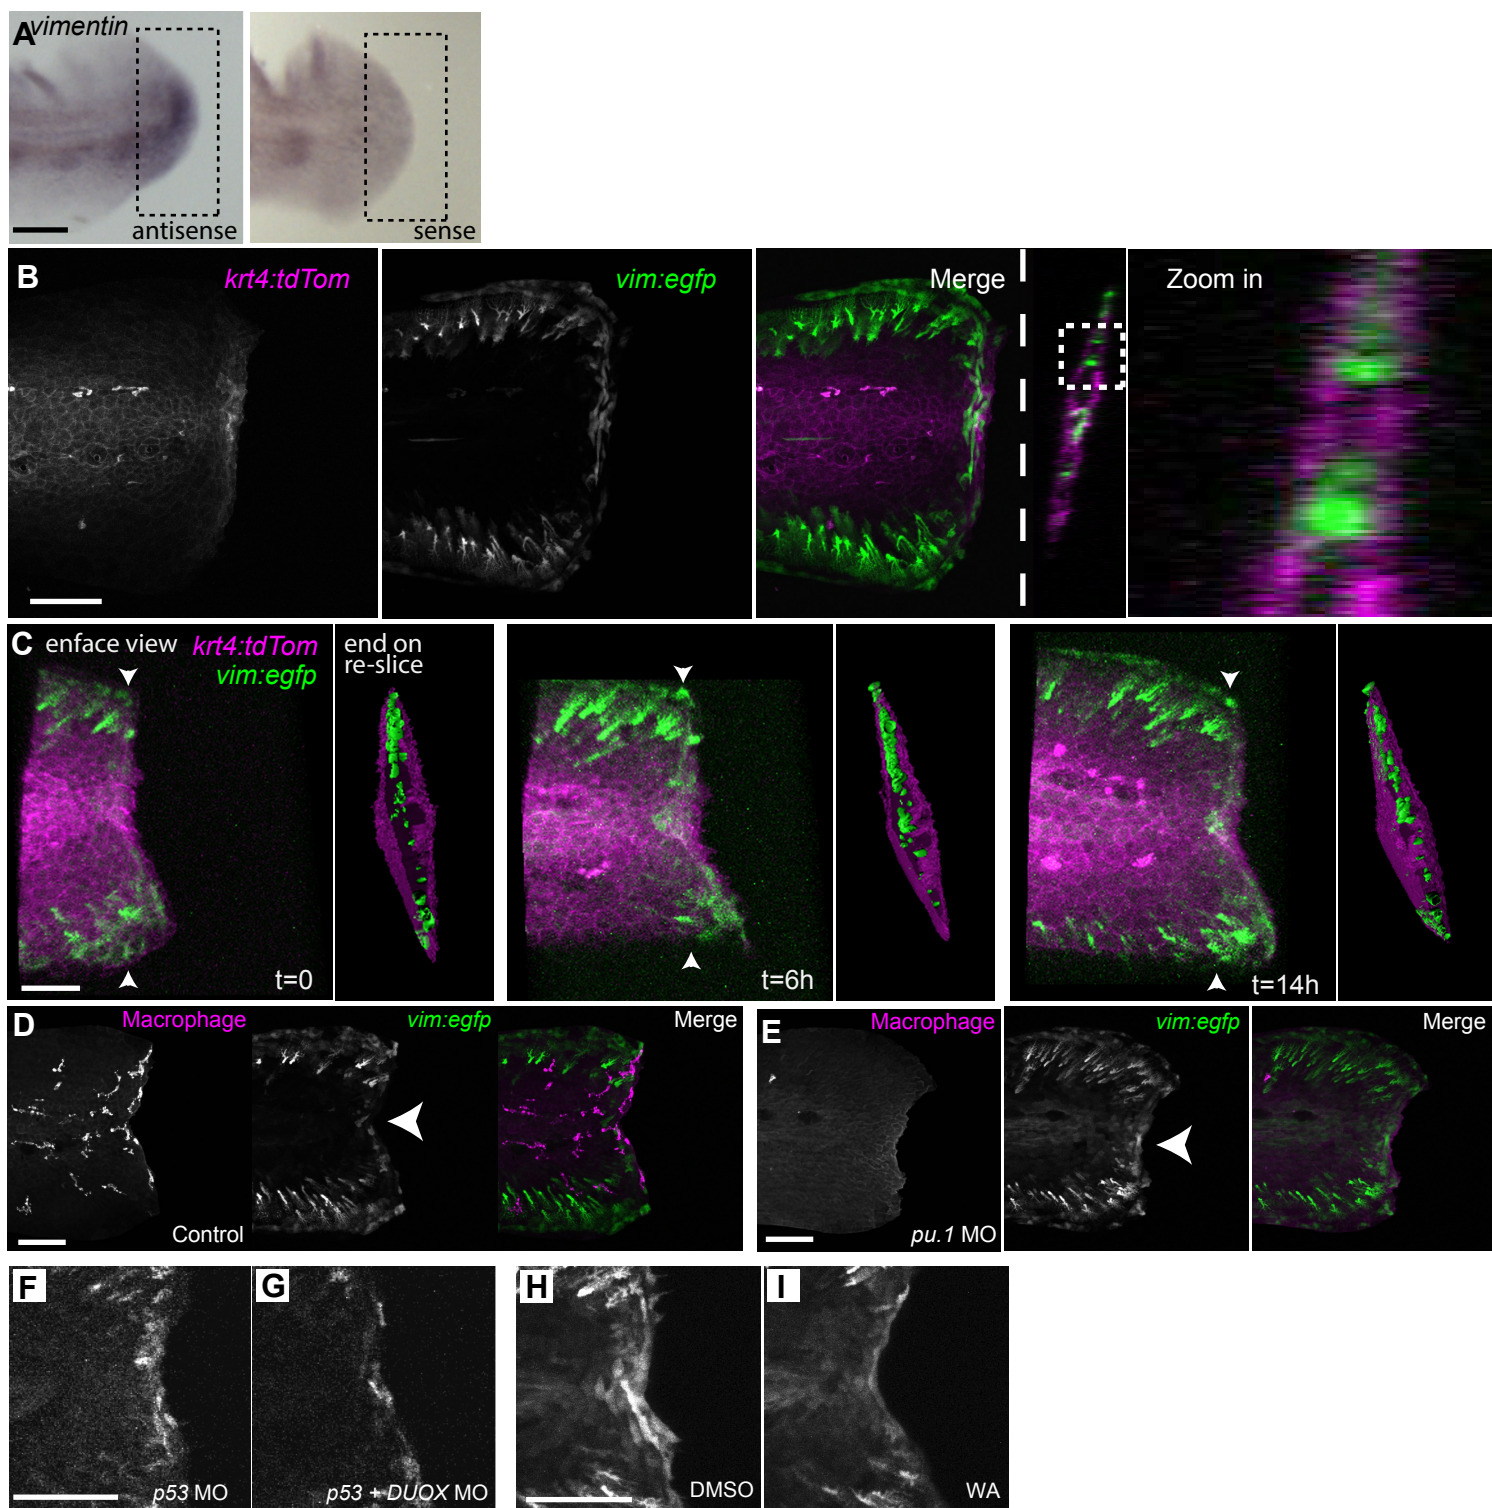

Figure 2-figure supplement 1

Supplement: supp [file elife-30703-supp-v1.zip]

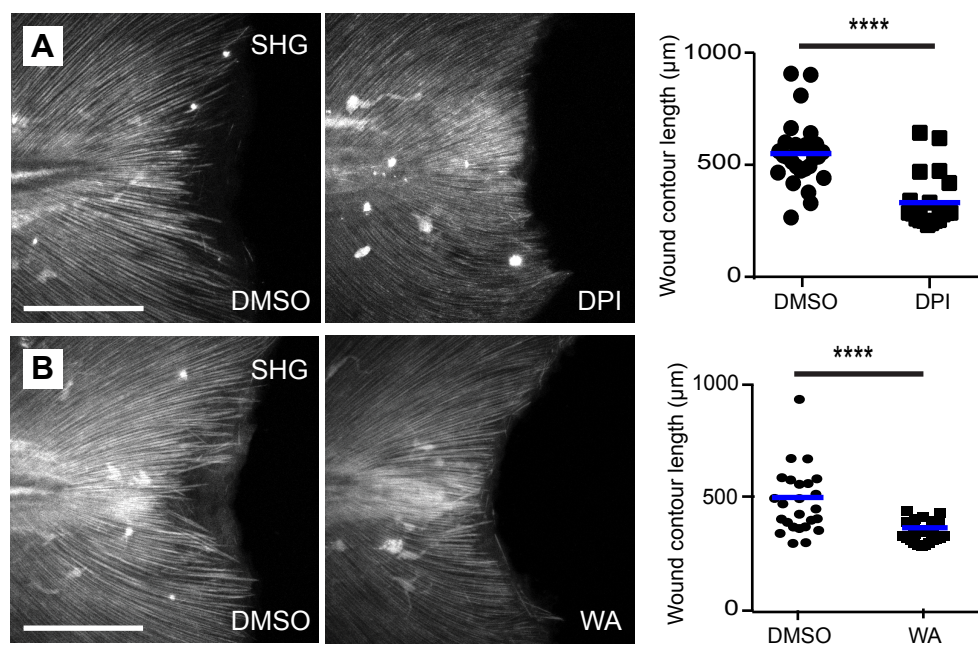

Figure 5-figure supplement 1

Supplement: supp [file elife-30703-supp-v1.zip]

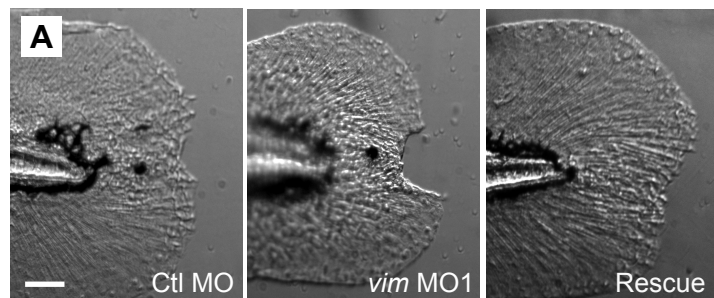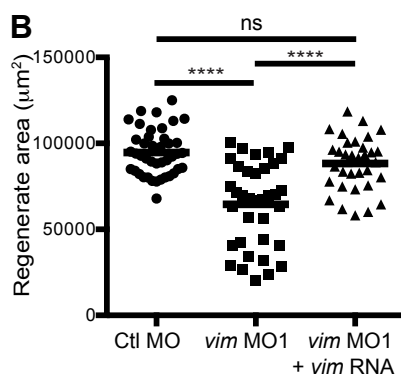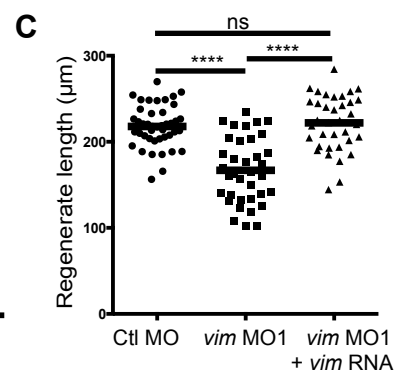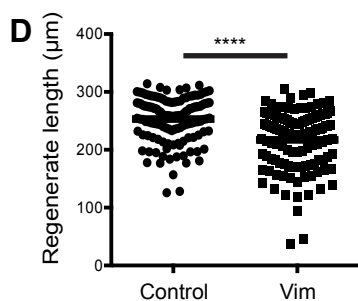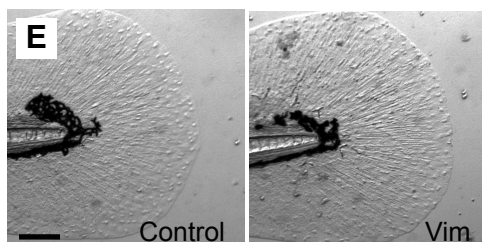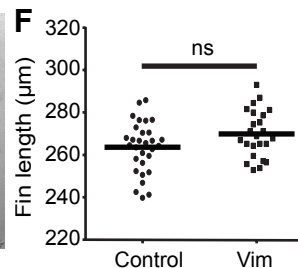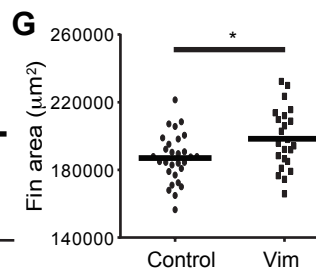

Supplement: supp [file elife-30703-supp-v1.zip]

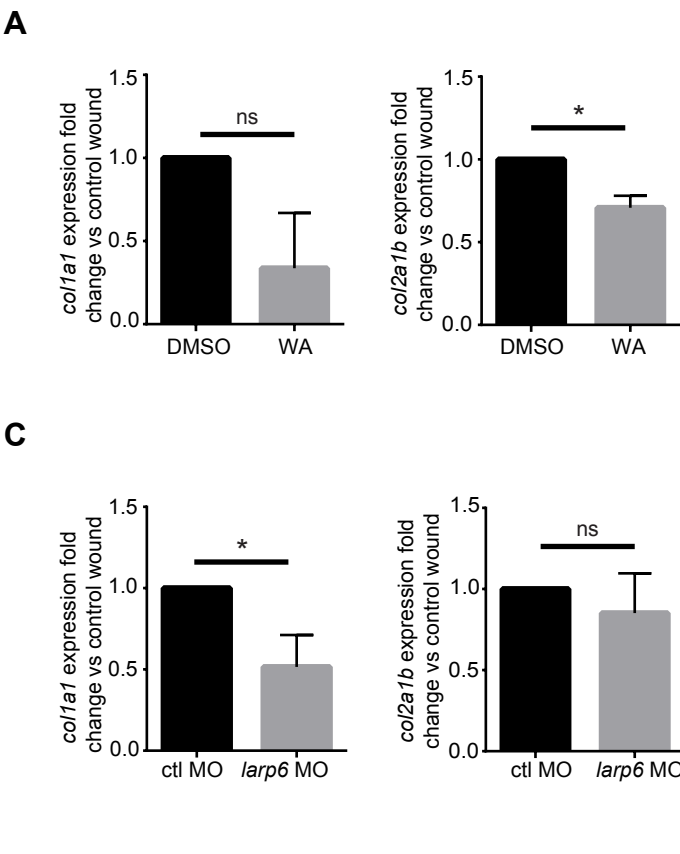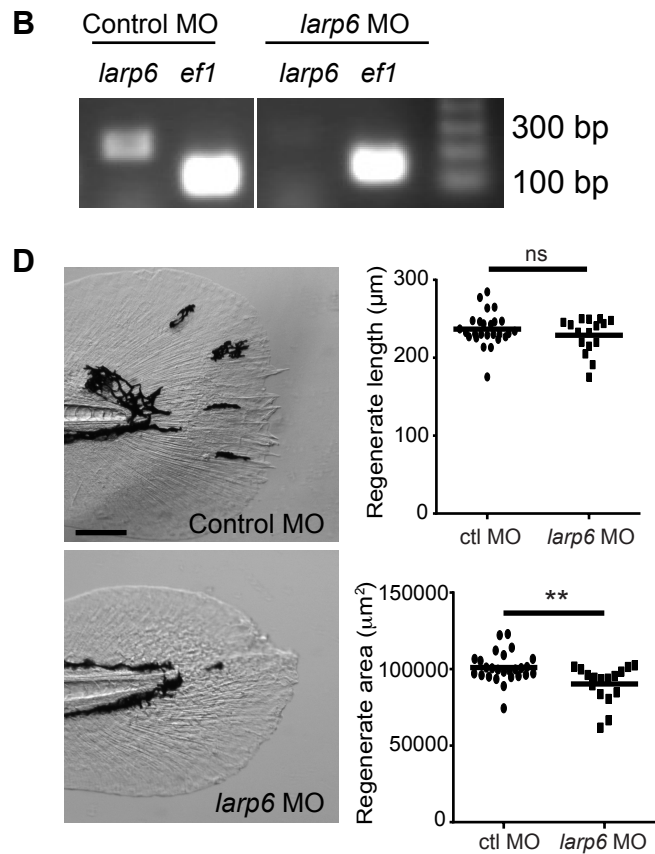

Figure 6-figure supplement 1

Supplement: supp [file elife-30703-supp-v1.zip]

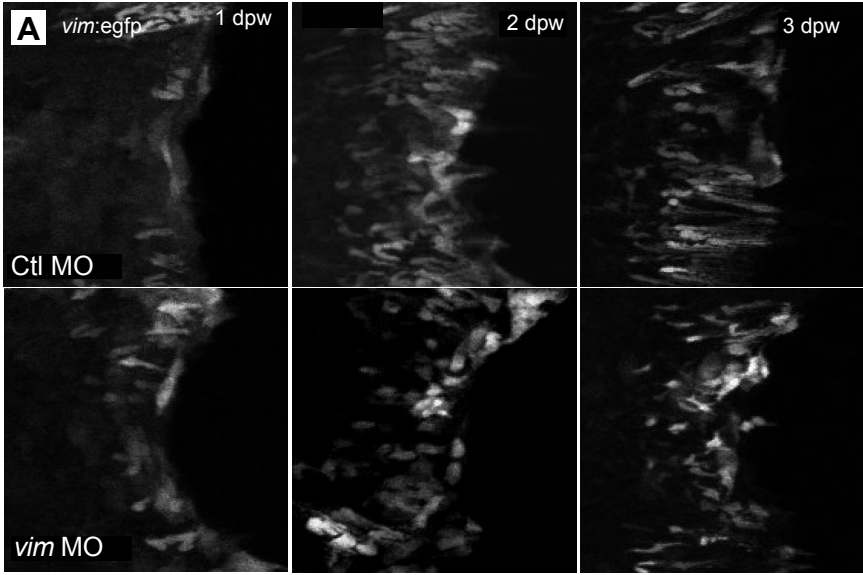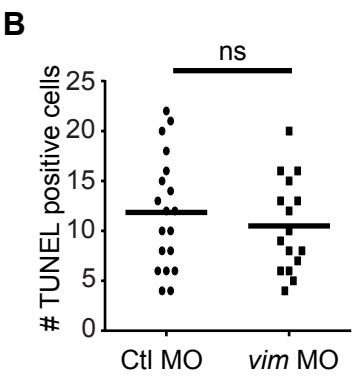

Figure 3-figure supplement 2

Supplement: supp [file elife-30703-supp-v1.zip]

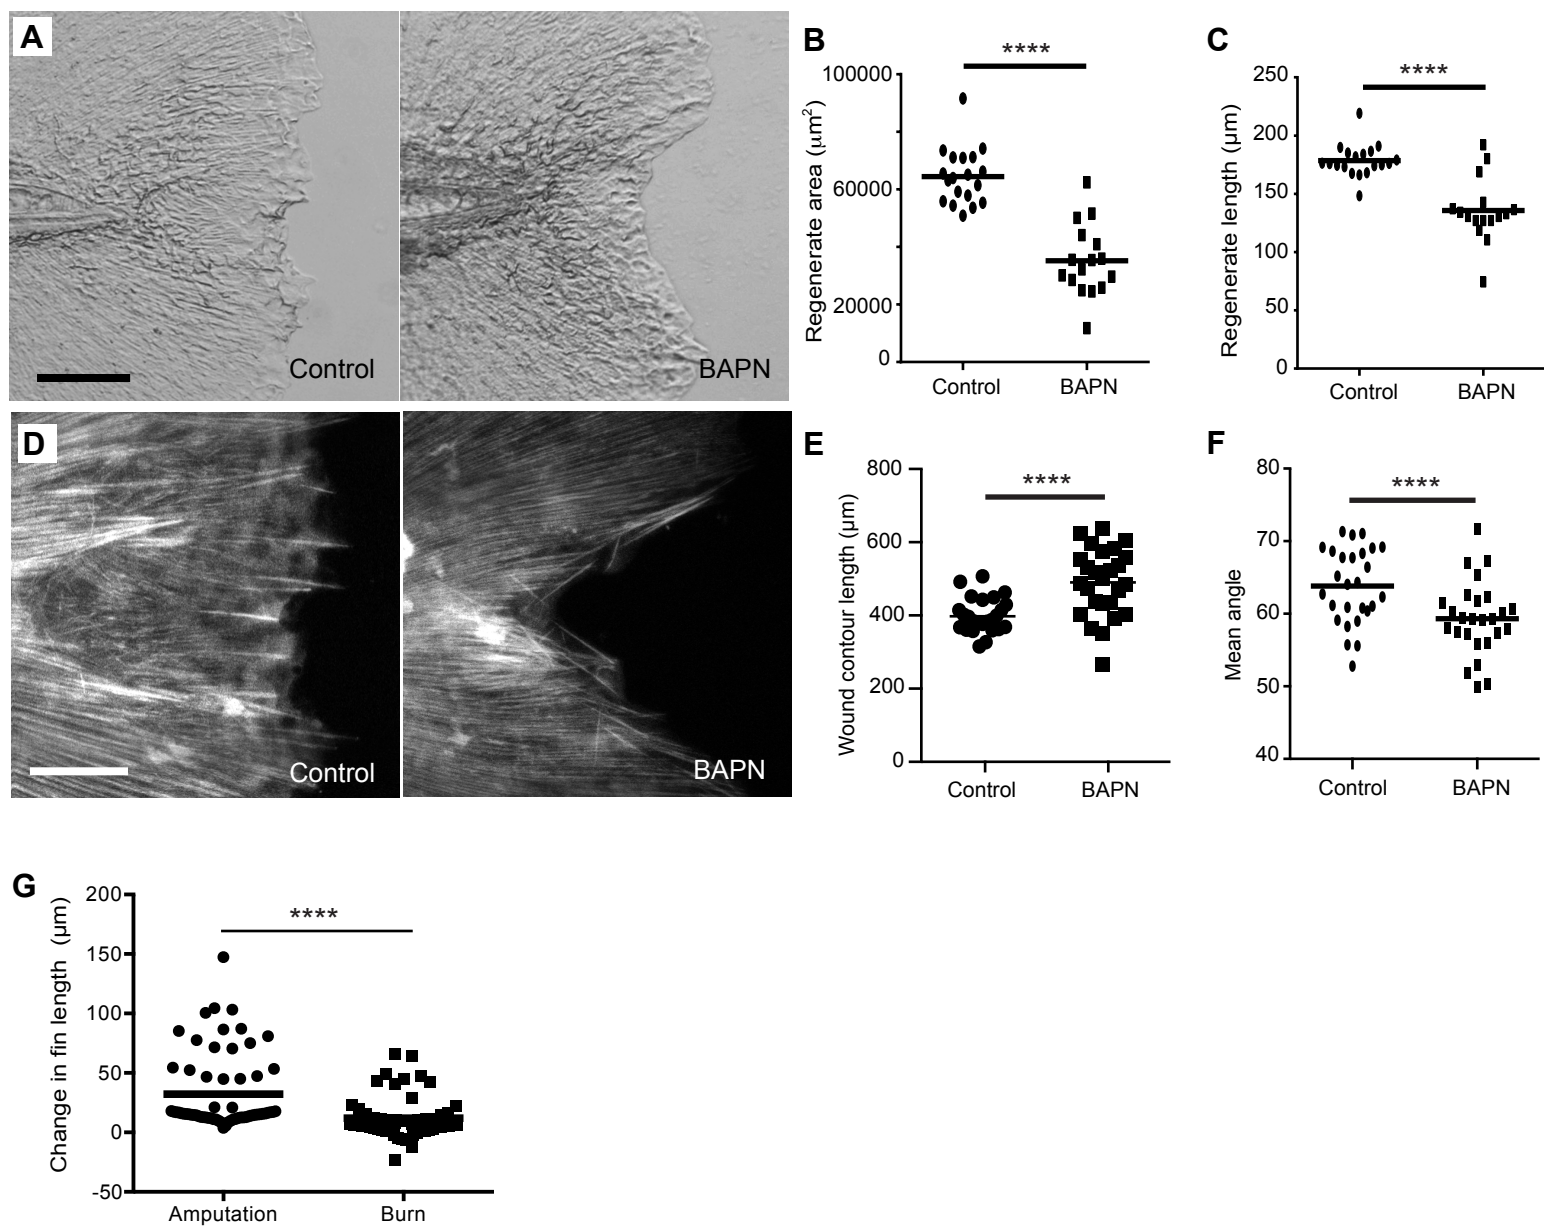

Figure 7-figure supplement 1

Supplement: supp [file elife-30703-supp-v1.zip]

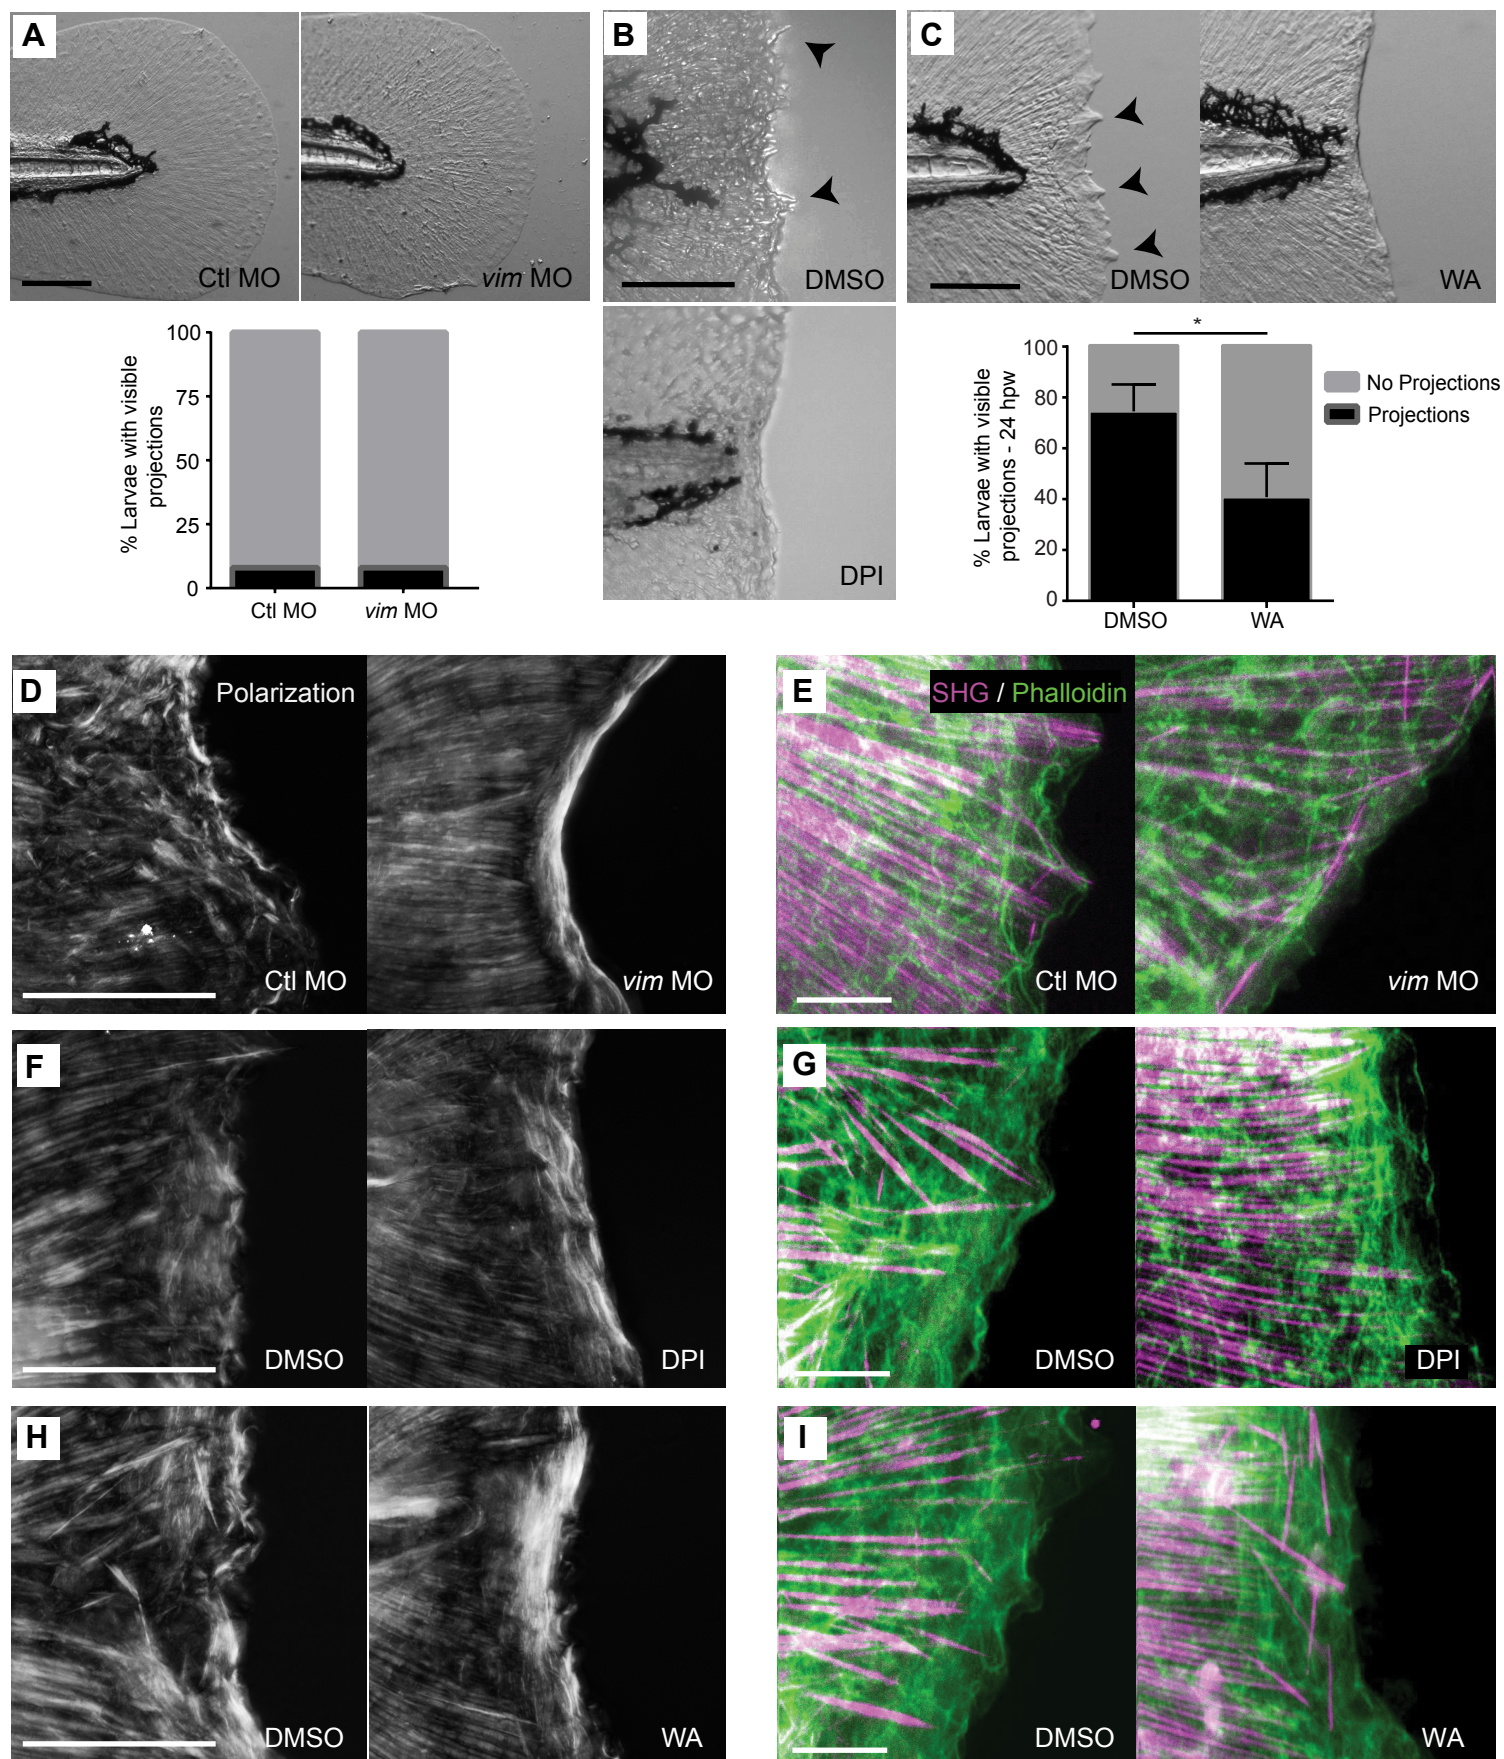

Figure 4-figure supplement 1

Supplement: supp [file elife-30703-supp-v1.zip]
